# Supplementary material for: Energy–entropy method using multiscale cell correlation to calculate binding free energies in the SAMPL8 host–guest challenge
Source: PubMed Central journal article supplement (PMC8367938; doi:10.1007/s10822-021-00406-5), 2021-07-15
Supplement: 10822_2021_406_MOESM1_ESM.pdf [file 10822_2021_406_MOESM1_ESM.pdf]

## Supplementary Information

### Energy-Entropy Method Using Multiscale Cell Correlation to Calculate Binding Free Energies in the SAMPL8 Host-Guest Challenge

Hafiz Saqib Ali<sup>1,2</sup>, Arghya Chakravorty<sup>4</sup>, Jas Kalayan<sup>1,2</sup>, Samuel P. de Visser<sup>1,3</sup> and Richard H. Henchman<sup>\*1,2</sup>

<sup>1</sup> Manchester Institute of Biotechnology, The University of Manchester, 131 Princess Street, Manchester M1 7DN, United Kingdom

<sup>2</sup> Department of Chemistry, The University of Manchester, Oxford Road, Manchester M13 9PL, United Kingdom

<sup>3</sup> Department of Chemical Engineering and Analytical Science, The University of Manchester, Oxford Road, Manchester M13 9PL, United Kingdom

<sup>4</sup> Department of Chemistry, University of Michigan, Ann Arbor, Michigan 48109, United States

\*Corresponding Author: Richard H. Henchman

[rhen7213@uni.sydney.edu.au](mailto:rhen7213@uni.sydney.edu.au)

Present Address: Sydney Medical School, The University of Sydney, Sydney, 2006 NSW, Australia

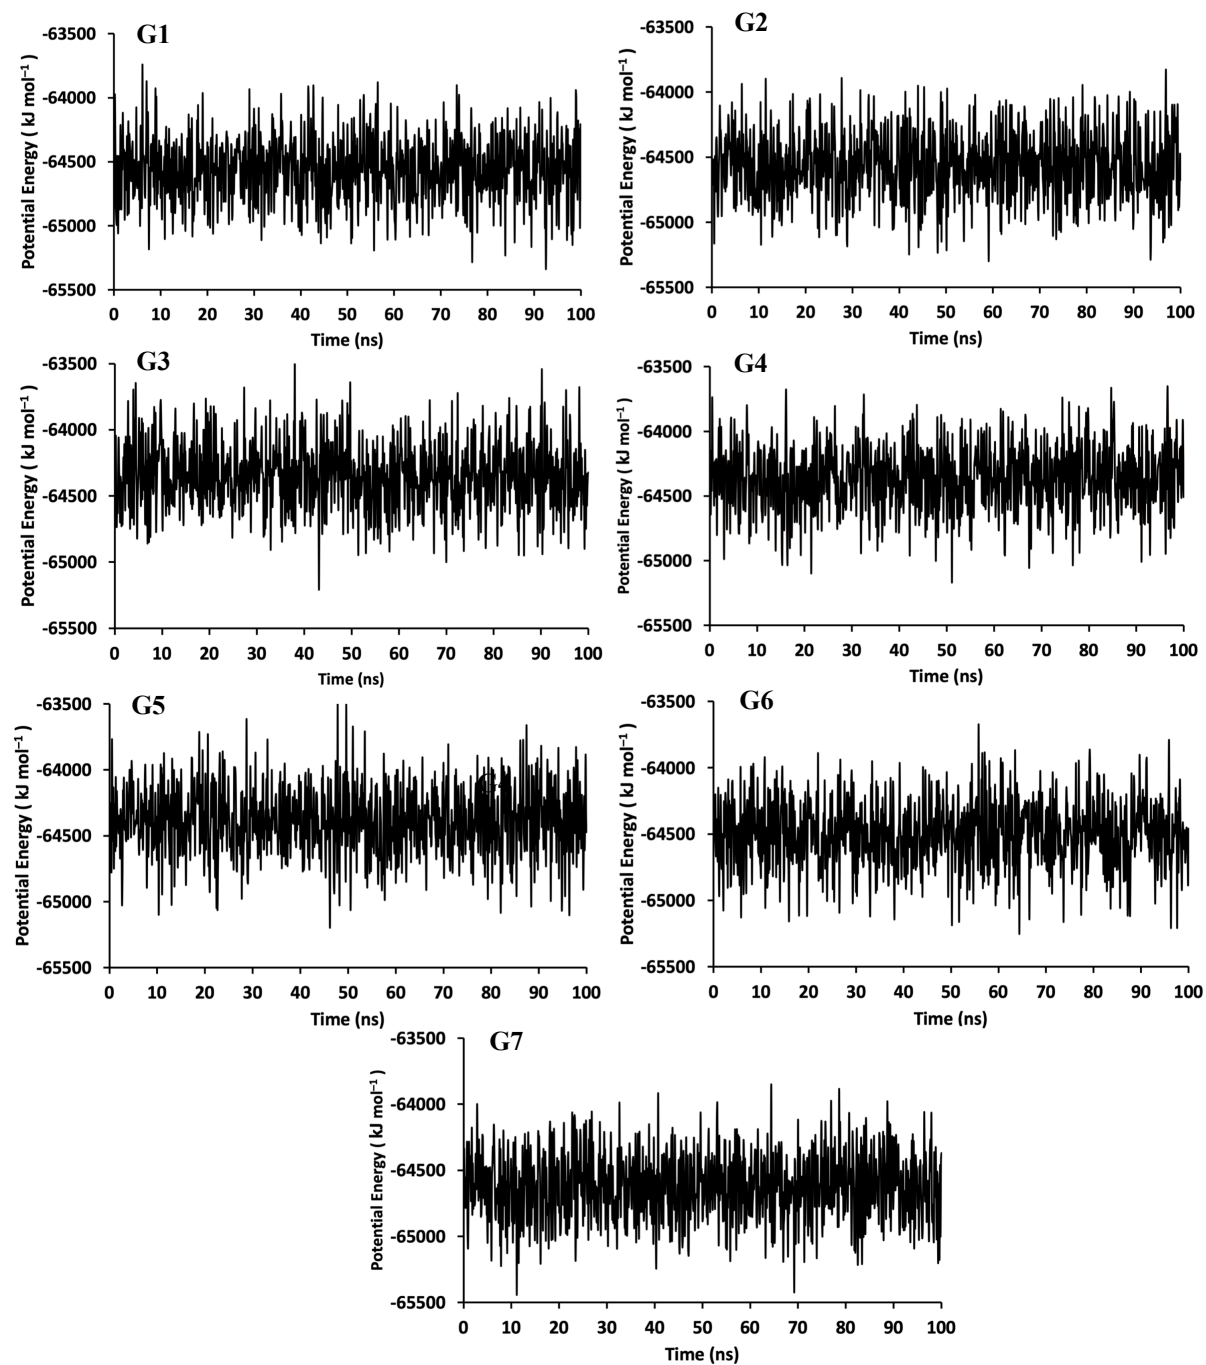

**Figure S1.** Potential energy versus time for the host-guest systems G1 to G7.

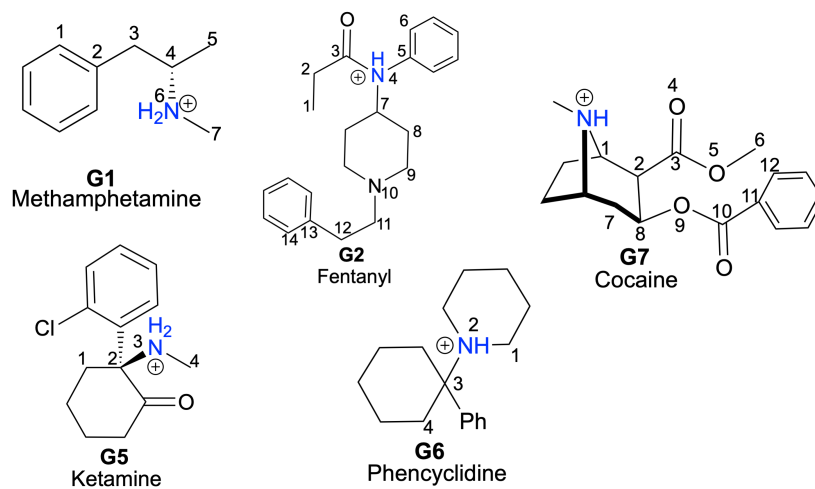

**Figure S2.** Numbering of the flexible dihedrals in guests: G1, G2, G5, G6 and G7.

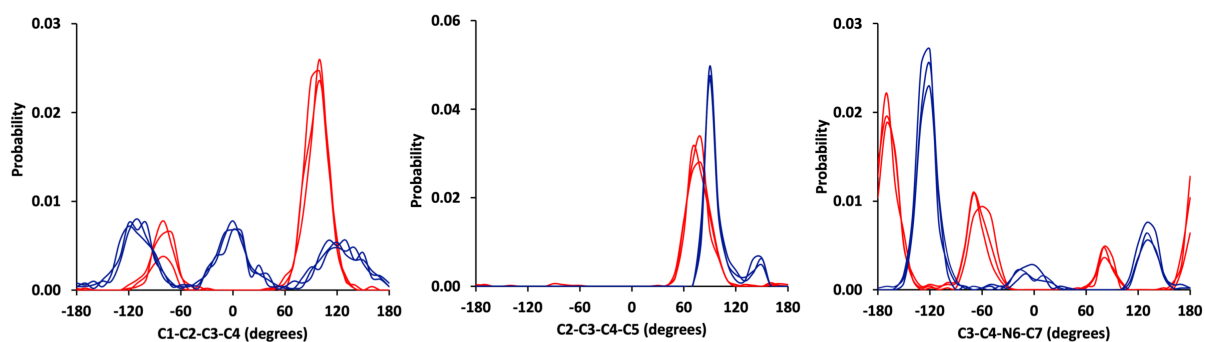

**Figure S3.** Dihedral distributions for all flexible dihedrals in guest G1 in the three unbound simulations (blue) and three bound simulations (red).

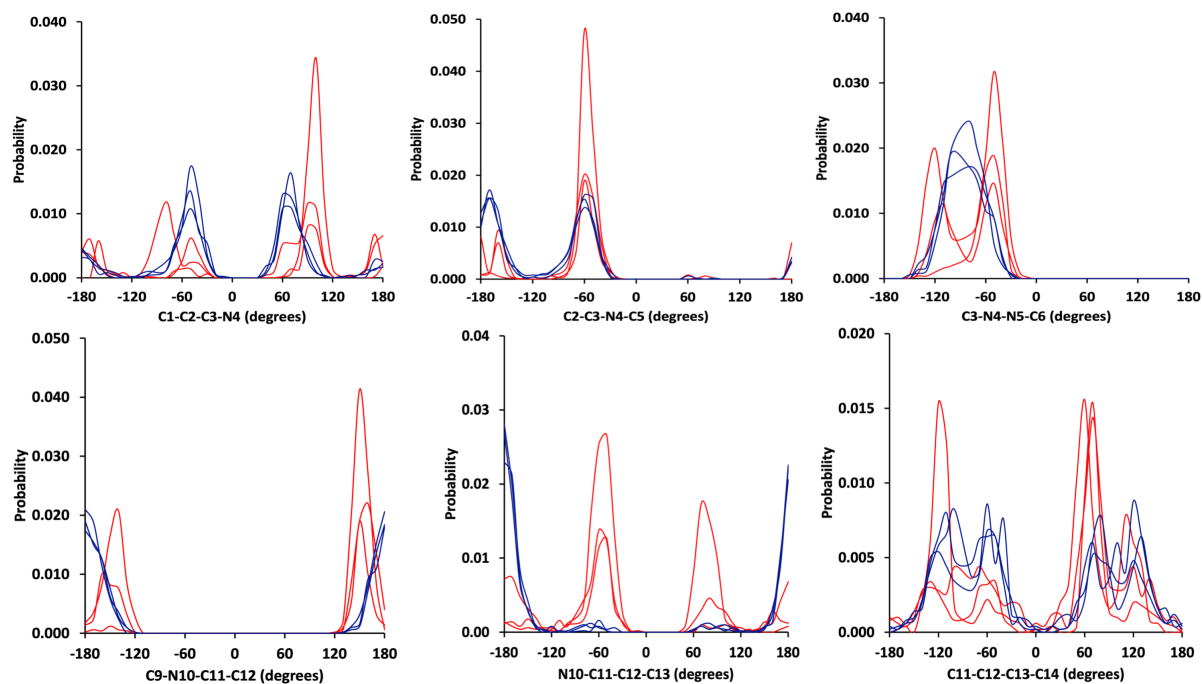

**Figure S4.** Dihedral distributions for all flexible dihedrals in G2 as in Figure S3.

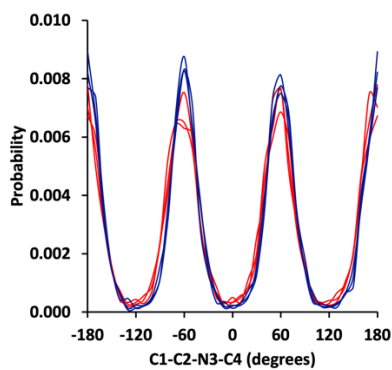

**Figure S5.** Dihedral distributions for all flexible dihedrals in G5 as in Figure S3.

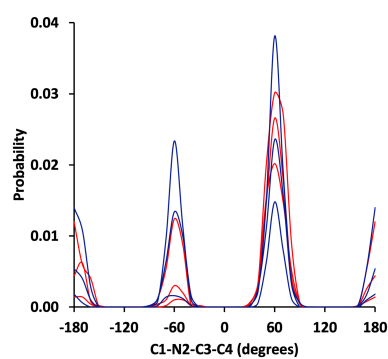

**Figure S6.** Dihedral distributions for all flexible dihedrals in G6 as in Figure S3.

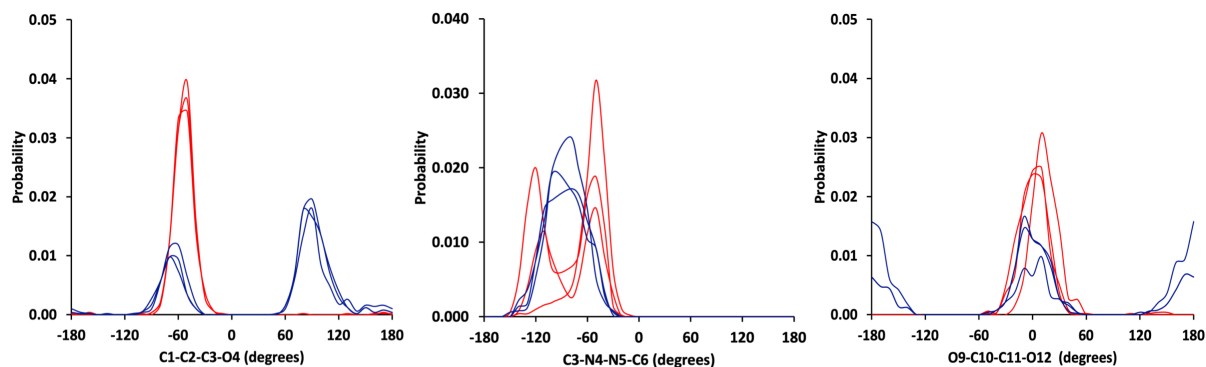

**Figure S7.** Dihedral distributions for all flexible dihedrals in G7 as in Figure S3.

**Table S1.** Slopes of the Lines of Best Fit ( $\text{kJ mol}^{-1} \text{ns}^{-1}$ ) for the Potential Energy versus Simulation Time in Figure S1

| Set of Calculations | G1    | G2     | G3     | G4    | G5     | G6     | G7     |
|---------------------|-------|--------|--------|-------|--------|--------|--------|
| 1 <sup>st</sup>     | 0.003 | 0.139  | -0.398 | 0.389 | -0.138 | 0.111  | 0.142  |
| 2 <sup>nd</sup>     | 0.026 | -0.019 | -0.025 | 0.019 | -0.013 | 0.182  | -0.243 |
| 3 <sup>rd</sup>     | 0.501 | -0.165 | -0.408 | 0.328 | 0.014  | -0.308 | 0.328  |

**Table S2.** Standard Error of the Mean (SEM) for the Components of the Entropy Differences ( $\text{J K}^{-1} \text{mol}^{-1}$ ) in Figures 4 and 5

| System            | G1   | G2  | G3   | G4  | G5  | G6   | G7  |
|-------------------|------|-----|------|-----|-----|------|-----|
| $\Delta S_{H,UA}$ | 1.8  | 0.4 | 3.4  | 1.0 | 1.0 | 1.2  | 1.7 |
| $\Delta S_{H,M}$  | 0.5  | 0.6 | 0.4  | 0.8 | 0.2 | 0.6  | 0.7 |
| $\Delta S_{G,UA}$ | 0.6  | 0.9 | 1.6  | 0.8 | 0.8 | 5.2  | 0.7 |
| $\Delta S_{G,M}$  | 0.2  | 0.9 | 0.8  | 0.5 | 0.5 | 0.5  | 0.5 |
| $\Delta S_{H,WS}$ | 15.0 | 4.3 | 12.2 | 7.2 | 7.8 | 10.3 | 6.4 |
| $\Delta S_{H,WB}$ | 5.5  | 2.0 | 0.9  | 0.4 | 1.0 | 0.6  | 1.4 |
| $\Delta S_{G,WS}$ | 3.1  | 4.5 | 1.0  | 4.2 | 2.2 | 3.3  | 1.0 |
| $\Delta S_{G,WB}$ | 1.1  | 7.7 | 6.4  | 5.6 | 2.9 | 5.0  | 2.4 |
